# Supplementary material for: Transitions of Care for People with Type 2 Diabetes: Utilization of Antihyperglycemic Agents Pre- and Post-Hospitalization
Source: Springer Nature journal article supplement (doi:10.1007/s13300-015-0148-5), 2015-12-11
Supplement: MOESM1 [file 9263410]

## *Why carry out this study?*

- A retrospective database study using a large representative US sample of adults with type 2 diabetes mellitus hospitalized during 2010-2012 ( $N = 8144$ ) was conducted.
- The objective was to assess antihyperglycemic agent (AHA) utilization patterns around transitions of care in and out of the hospital.

## *What was learned from the study?*

- Patients who did not have a claim for AHAs before their hospitalization were unlikely to have one afterward, and patients who did utilize AHAs before hospitalization often discontinued them following discharge.
- The results of this study suggest that AHA therapy during transitions of care in and out of the hospital may not be optimal.

This summary slide represents the opinions of the authors. Sponsorship for this study was funded by Janssen Scientific Affairs, LLC. For a full list of acknowledgments and disclosures for all authors of this article, please see the full text online. © The Author(s) 2015. Creative Commons Attribution Noncommercial License (CC BY-NC).
